# Supplementary material for: Recovery of Palladium from Acidic Solution Using Polyethylenimine-Crosslinked Calcium Silicate Hydrate Derived from Oyster Shell Waste: Adsorption and Mechanisms
Source: Hindawi journal article supplement (doi:10.1155/2023/6473526), 2023-01-01
Supplement: f1 [file 6473526.f1.docx]

Recovery of palladium from acidic solution using polyethylenimine-crosslinked calcium silicate hydrate derived from oyster shell waste: adsorption and mechanisms

Su Bin Kang a, Zhuo Wang a, Sung Wook Won a,b,*

a Department of Ocean System Engineering, Gyeongsang National University, 2 Tongyeonghaean-ro, Tongyeong, Gyeongnam 53064, Republic of Korea.

b Department of Marine Environmental Engineering, Gyeongsang National University, 2 Tongyeonghaean-ro, Tongyeong, Gyeongnam 53064, Republic of Korea.

*Corresponding author. Tel.: +82 55 772 9136, Fax: +82 55 772 9139, E-mail address: sungukw@gnu.ac.kr (S.W. Won).

**Isotherm models**

The Langmuir, Freundlich, Sips, Redlich-Peterson, and Temkin isotherm models can be summarized as follows:

Langmuir model: (1)

Freundlich model: (2)

Sips model: (3)

Redlich-Peterson model: (4)

Temkin model: (5)

where *Ce* (mg/L) denotes the residual concentration of Pd(II), *qe* (mg/g) is the amount of Pd(II) adsorbed at equilibrium, and *qmax* (mg/g) denotes the maximum adsorption amount. The Langmuir constant, *bL* (L/g), is connected to the adsorption free energy. The Freundlich constant and exponent, respectively, are denoted by *KF* (L/g) and *n*. The Sips model constant associated with the affinity constant is *KS* (L/mg). *KR* (L/g) and *R* (L/mg) are the corresponding Redlich-Peterson model constants. The values of *bT* indicate whether the adsorption process is exothermic (*bT* > 0) or endothermic (*bT*< 0). *KT* (L/mg) is the equilibrium bond constant connected to the maximal energy of the bond, and *bT* (J/mol) is the constant concerned with the sorption heat. The gas constant (8.314 J/mol K), the temperature, and the heterogeneity factor are each represented by the letters *R*, *T* (K), and *n*. The dimensionless separation factor *RL*, one of the crucial parameters of the Langmuir model that provides insight into the favorability of the adsorption process, was also calculated using the Eq. (6):

(6)

*RL* represents the affinity between the adsorbent and adsorbate, either irreversible (*RL* = 0), favorable (0 < *RL* <1), liner (*RL* = 1) or unfavorable (*RL* > 1).

**Kinetic models**

The pseudo-first-order (PFO), pseudo-second-order (PSO), Elovich, and intraparticle diffusion models are shown as follows:

PFO kinetic model: (7)

PSO kinetic model: (8)

where the uptake of Pd(II) at time *t* is represented by *qt* (mg/g), and the uptake of Pd(II) at equilibrium is represented by *q1* and *q2* (mg/g). The rate constants for the PFO and PSO kinetic models are *k1* (L/min) and *k2* (g/g‧min), respectively. Eq. (11) gives the definition of the initial sorption rate, *h* (mg/g‧min), at the time of convergence to zero.

(9)

Elovich model: (10)

Intraparticle diffusion model: (11)

where *α* (mg/g∙min) represents the initial adsorption rate, and *β* (g/mg) denotes the degree of surface coverage and the activation energy for chemisorption. The value of *1/β* indicates the number of available adsorption sites, while the value of (*1/β*) ∙ln(αβ) indicates the amount of adsorption at ln *t* = 0. *kp* (mg/g∙min0.5) is the rate constant of the intraparticle model. *C* is a constant that represents the thickness of the boundary layer.
